# Supplementary material for: Generation mechanism of hydroxyl radical species and its lifetime prediction during the plasma-initiated ultraviolet (UV) photolysis
Source: PubMed Central journal article supplement (PMC4367430; doi:10.1038/srep09332), 2015-03-20
Supplement: srep09332-s1.pdf [file srep09332-s1.pdf]

## Supporting file

### Generation mechanism of hydroxyl radical species and its lifetime prediction during the plasma-initiated ultraviolet (UV) photolysis

Pankaj Attri<sup>a</sup>, Yong Hee Kim<sup>a</sup>, Dae Hoon Park<sup>a</sup>, Ji Hoon Park<sup>a</sup>, Young J. Hong<sup>a</sup>, Han Sup Uhm<sup>a</sup>, Kyung Nam Kim<sup>b</sup> Alexander Fridman<sup>c</sup> and Eun Ha Choi<sup>\*a</sup>

<sup>a</sup>*Plasma Bioscience Research Center, Kwangwoon University, Seoul, Korea.*

<sup>b</sup>*Yonsei University, Seoul, Korea.*

<sup>c</sup>*Drexel Plasma Institute, Drexel University, PA, USA.*

### Supporting Figure Captions

**Figure S1.** Hydrogen bonding calculation between OH radicals and H<sub>2</sub>O using semiempirical calculations with the help of Hyperchem 7. We have chosen the (a) 2 OH radical and 40 water molecules for the first calculation. This is try to resemble the inside depth of water ~ 6 mm, where less OH radical and more water molecules (assumption); (b) We choose the 4 OH radical and 40 water molecules to resemble the condition at ~ 4 mm (assumption).

**Figure S2.** Optical microscope images for cell viability of lung cancer H460 cells by FDA (Fluorescein diacetate hydrolysis : live) and PI (Propidium Iodide : dead) staining assays just after the Ar plasma jet treatment for 10 s, 30 s, and 60 s, where H460 cells are adherent inside the PBS at 2 mm, 4 mm, and 6 mm depth positions.

**Figure S3** (a) Schematic needle-typed nonthermal plasma jet operating at the atmospheric pressure; (b) Optical emission and ultraviolet absorption spectroscopy used for ROS measurement above and below the solutions. The argon glove box has been used as shown in the dotted box region to eliminate the optical signals from N<sub>2</sub> molecules in air caused by the nonthermal Ar plasma jet, close to 309 nm, which is the emission and absorption line of the hydroxyl OH species; (c) Schematic view of the  $\gamma$ -focused ion beam ( $\gamma$ -FIB) consisting of the thermal electron source, the ionization region of ions, the electrostatic single Einzel lens that focused the ion beam, and the collector and copper pad for the measurement of the secondary

electron emissions from the surface of the biological thin films.

**Table S1.** Calculated binding energies ( $E$ ), heats of formations ( $\Delta H_f$ ), and estimated hydrogen bond energies ( $\Delta\Delta H_f$ ) (kcal /mol)

| Solvent                |    | $E/$ (kcal /mol) | $\Delta H_f/$ (kcal /mol) | $\Delta\Delta H_f/$ (kcal /mol) |
|------------------------|----|------------------|---------------------------|---------------------------------|
| 2 OH radical           |    | -197.378         | 8.511                     |                                 |
| 40 water               |    | -8837.639        | -2123.356                 |                                 |
| 2 OH radical and water | 40 | -9196.080        | -2258.470                 | 126.603                         |
| 4 OH radical           |    | -393.509         | 18.706                    |                                 |
| 4 OH radical and water | 40 | -9176.866        | -2179.702                 | 37.64                           |

**Table S2:** Current measurements in different pH solution during plasma exposure.

| pH   | Voltage | Electrode | Current      | Gap (mA) |
|------|---------|-----------|--------------|----------|
|      |         |           | Average (mA) |          |
| pH 5 | 20V     | Upper     | 1.606        | 0.0755   |
|      |         | Lower     | 1.681        |          |
| pH 7 | 20V     | Upper     | 1.547        | 0.0990   |
|      |         | Lower     | 1.646        |          |
| pH 9 | 20V     | Upper     | 1.326        | 0.1785   |
|      |         | Lower     | 1.504        |          |

(a)

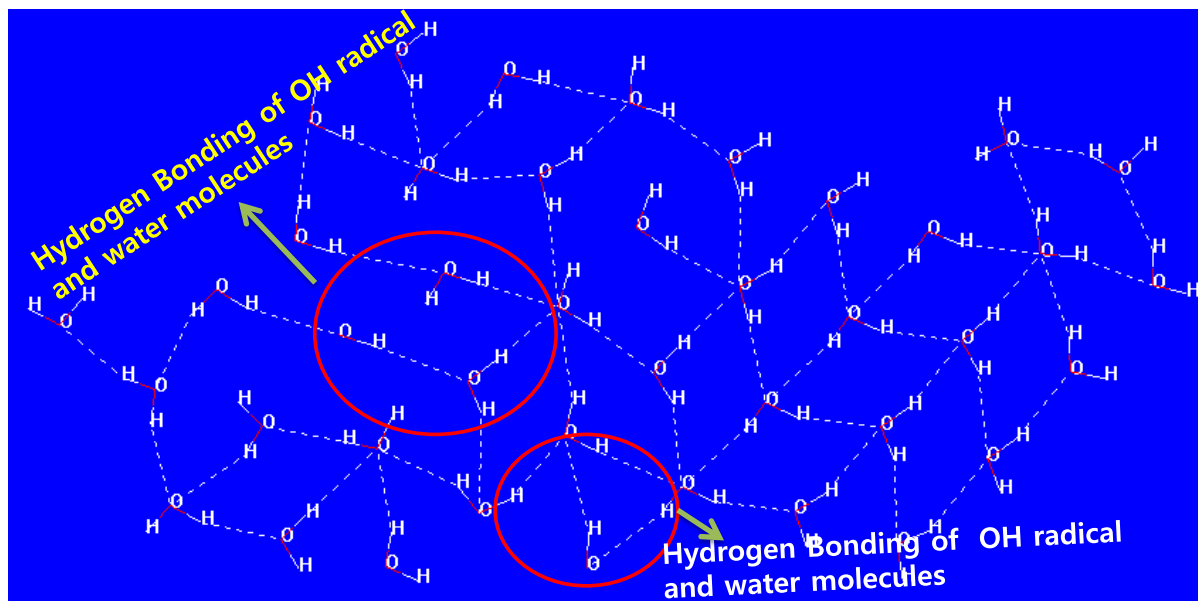

(b)

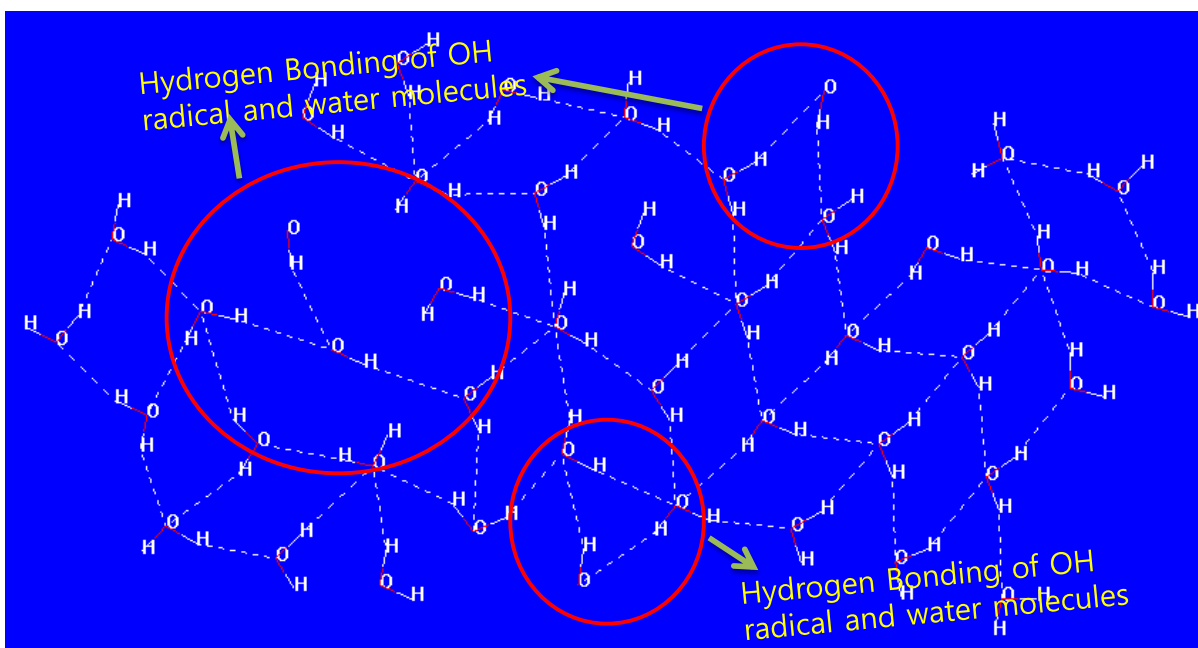

Figure S1.

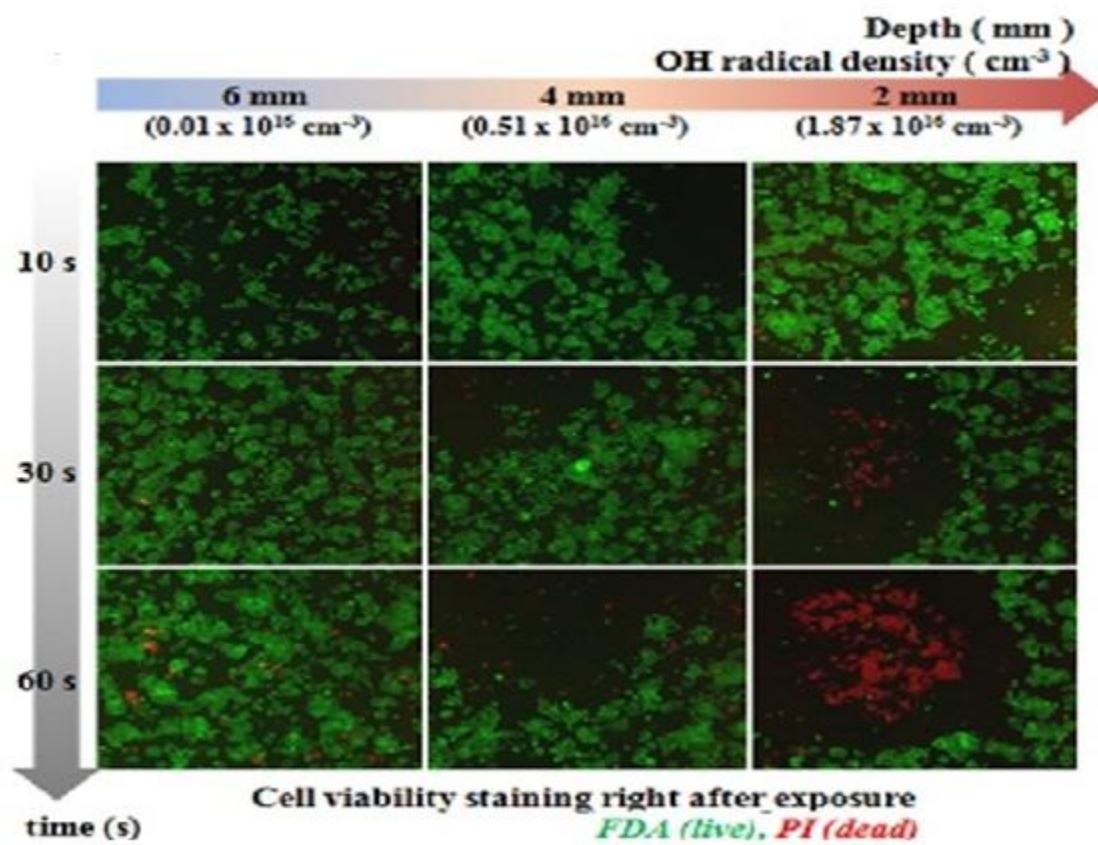

Figure S2

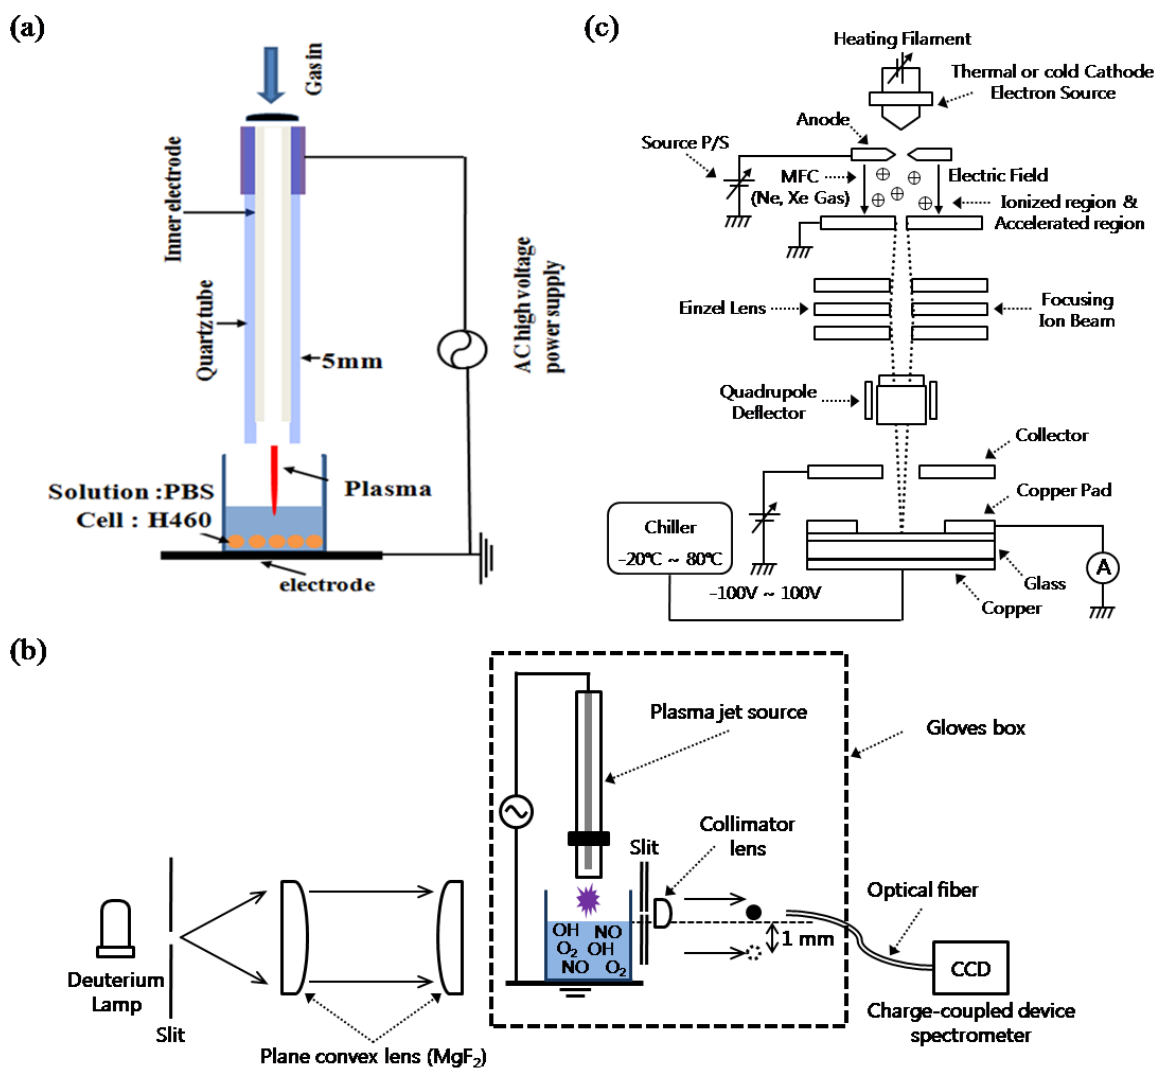

Figure S3
